# Supplementary material for: The Genetic Effect of Copy Number Variations on the Risk of Type 2 Diabetes in a Korean Population
Source: PubMed Central journal article supplement (PMC3081314; doi:10.1371/journal.pone.0019091), 2011-04-22

Figure S4

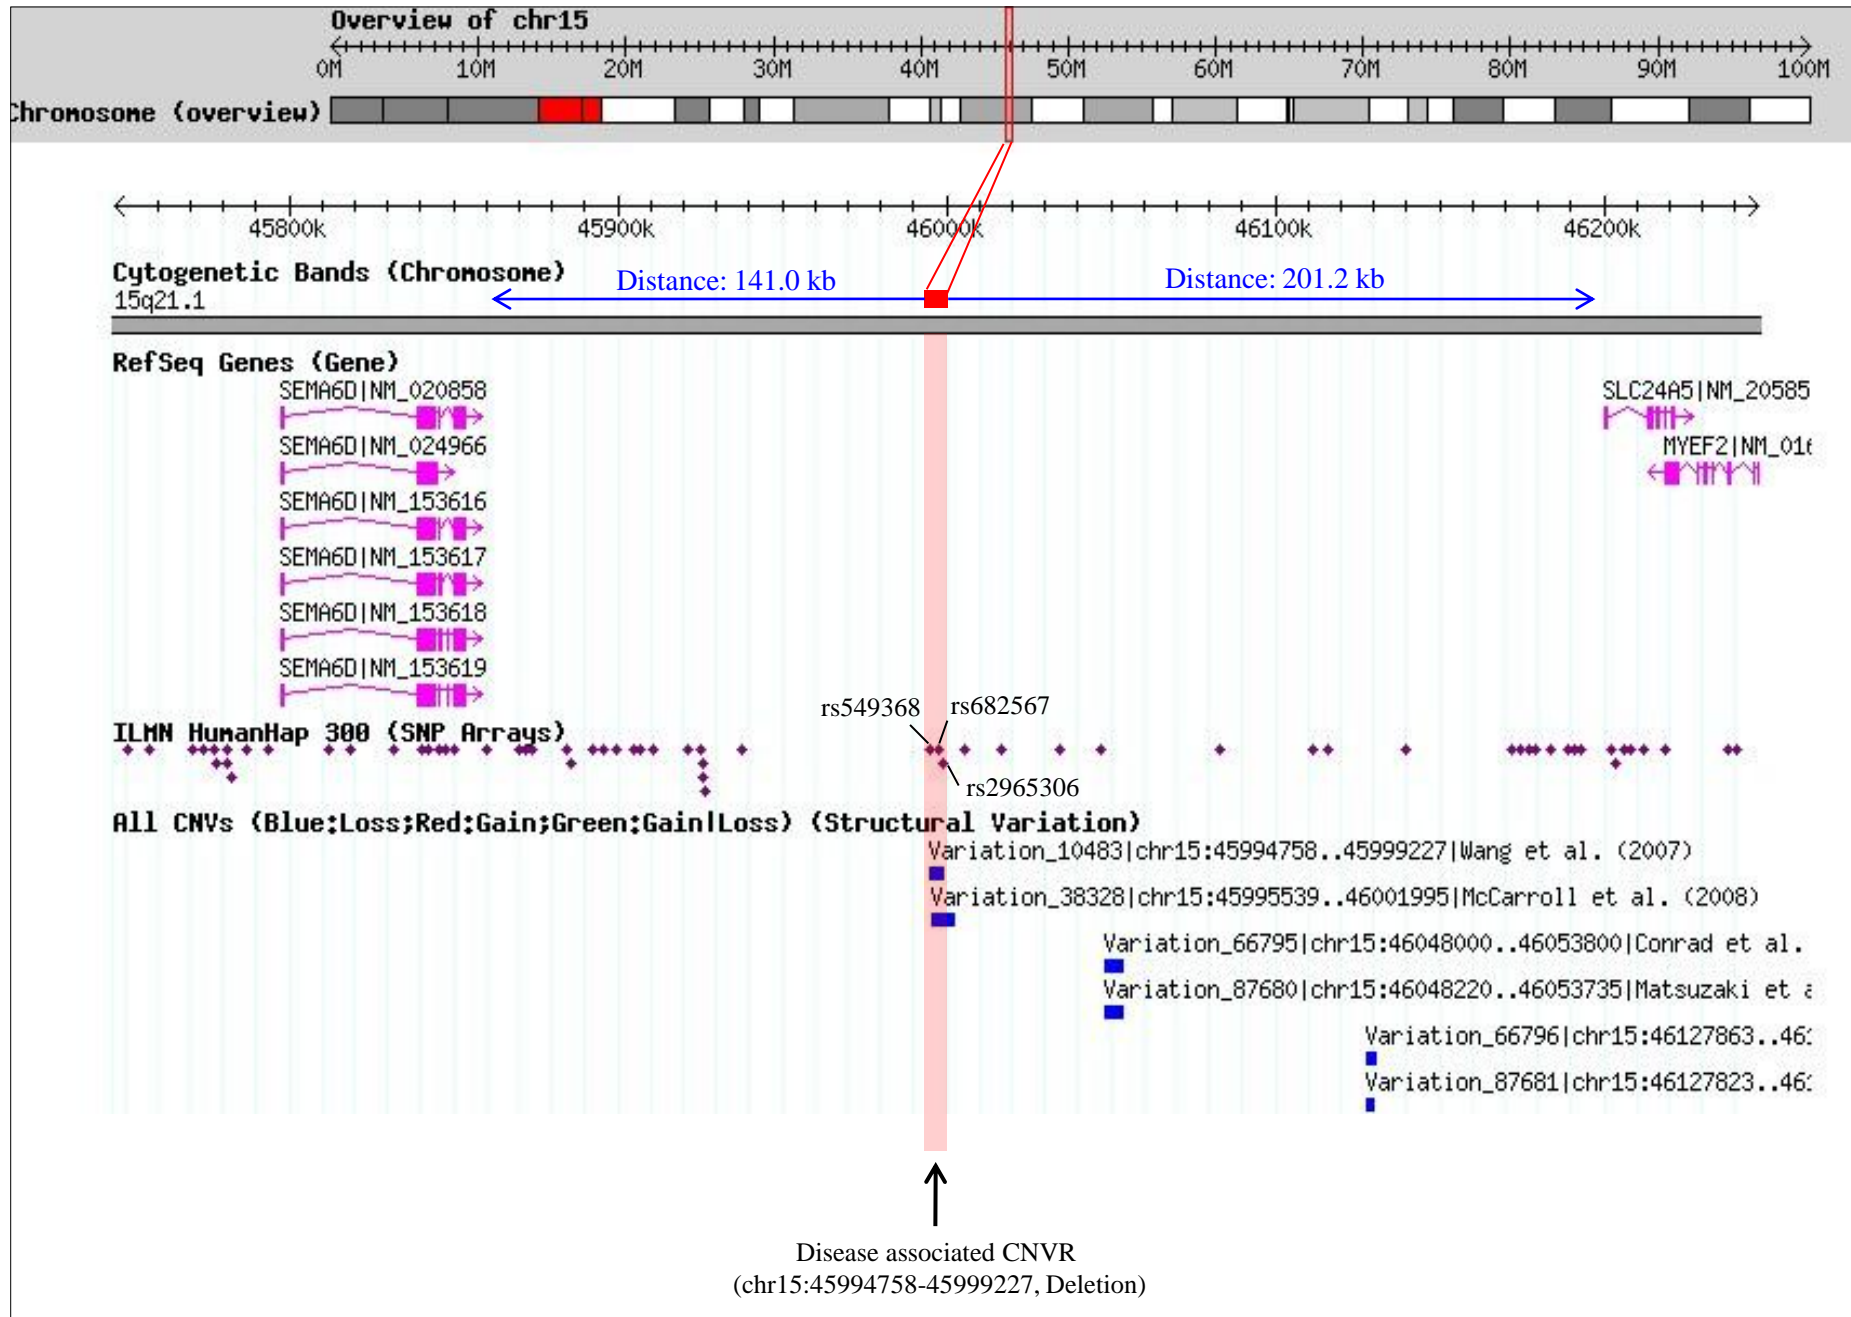

Supplement: pone.0019091.s004.pdf [file pone.0019091.s004.pdf]
